# Supplementary material for: Isoliquiritigenin Ameliorates Acute Pancreatitis in Mice via Inhibition of Oxidative Stress and Modulation of the Nrf2/HO‐1 Pathway
Source: Hindawi journal article supplement (doi:10.1155/2018/7161592), 2018-01-01
Supplement: f1 [file 7161592.f1.pdf]

Supplementary Table 1. Histopathological Scoring of Pancreatic injury.

| Score | Edema                                     | Acinar necrosis                                          | Inflammation                                      |
|-------|-------------------------------------------|----------------------------------------------------------|---------------------------------------------------|
| 0     | Absent                                    | Absent                                                   | 0-5 leukocytes/HPF                                |
| 1     | Diffuse expansion of interlobar septae    | 1-4 necrotic cells/HPF                                   | 6-15 leukocytes/HPF                               |
| 2     | Diffuse expansion of interlobular septae  | 5-10 necrotic cells/HPF                                  | 16-25 leukocytes/HPF                              |
| 3     | Diffuse expansion of interacinar septae   | 11-16 necrotic cells/HPF<br>(foci of confluent necrosis) | 26-35 leukocytes/HPF                              |
| 4     | Diffuse expansion of intercellular spaces | >16 necrotic cells/HPF<br>(extensive confluent necrosis) | >35 leukocytes/HPF or<br>confluent microabscesses |

Acinar cell necrosis and inflammatory infiltration were counted as the average number per 10 fields at magnification 400 ×.

Supplementary Table 2. Histopathological Scoring of Lung injury.

| Score | Thickness of alveolar | Infiltration of neutrophils | Alveolar congestion |
|-------|-----------------------|-----------------------------|---------------------|
| 0     | Absent                | Absent                      | Absent              |
| 1     | Discrete              | Discrete                    | Small foci          |
| 2     | Moderate              | Moderate                    | Large foci          |
| 3     | Severe                | Severe                      | Diffuse             |

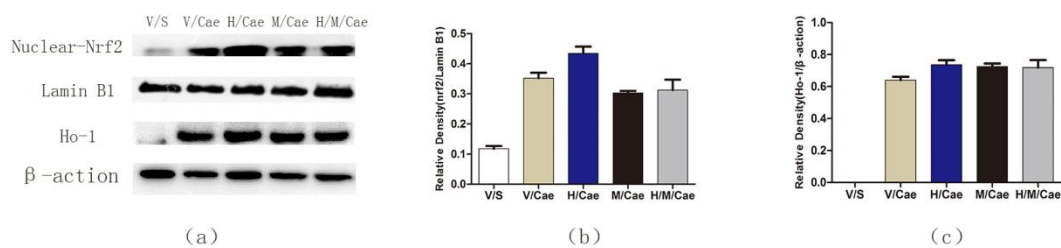

**Supplementary figure 1. A Nrf2 inhibitor, ML385, counteracted the protective effect of ISL on mice with MAP.** (a-c) Protein levels of Nuclear Nrf2 and HO-1 in the pancreatic tissues were analyzed by western blotting. Lamin B1 and  $\beta$ -Actin were used as a control for protein loading. n=12 each group. V represents vehicle; S represents saline; H represents high-dose ISL (200 mg/kg); M represents Nrf2 inhibitor, ML385.
